# Supplementary material
Source: Springer Nature journal article supplement (https://www.springermedizin.de/resource/supplementary/12889_2013_6155_MOESM1_ESM.pdf/9497050)

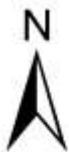

Kinmen Islands

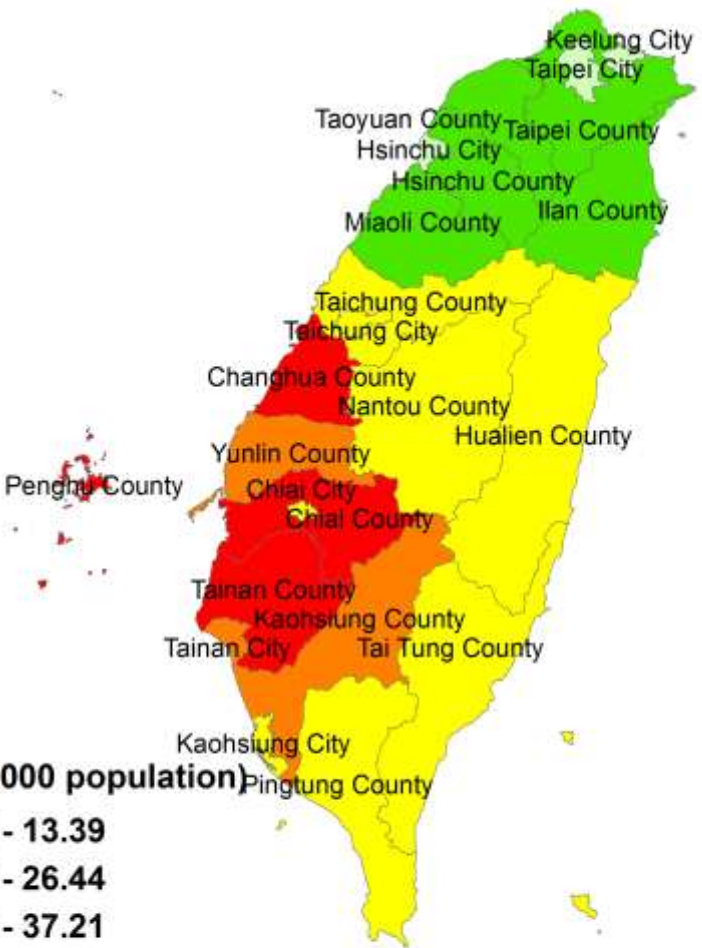

**Legend**  
**Incidence (per 100,000 population)**

-  10.78 - 13.39
-  13.40 - 26.44
-  26.45 - 37.21
-  37.22 - 52.20
-  52.21 - 77.09

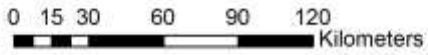

Supplement: MOESM1 [file 9497050]
